# Supplementary material
Source: publisher figshare collection journal article supplement (https://acs.figshare.com/ndownloader/files/4099909)
Supplement: Supplementary file 1 [file 4099909]

## SUPPORTING INFORMATION

### **High-performing mesoporous iron oxalate anodes for lithium-ion batteries**

Wei An Ang<sup>1,2</sup>, Nutan Gupta<sup>1,3</sup>, Raghavan Prasanth<sup>1,2</sup>, and Srinivasan Madhavi<sup>1,2,3,\*</sup>

<sup>1</sup>School of Materials Science and Engineering, Nanyang Technological University,  
50 Nanyang Avenue, Singapore 639798

<sup>2</sup>Energy Research Institute @ NTU (ERI@N), Nanyang Technological University,  
50 Nanyang Drive, Singapore 637553

<sup>3</sup>TUM-CREATE Center for Electromobility, Nanyang Technological University,  
62 Nanyang Drive, Singapore 637459

\*Corresponding Author: Email: [madhavi@ntu.edu.sg](mailto:madhavi@ntu.edu.sg); Tel: +65 67904606; Fax: +65 67909081

X-ray photoelectron spectroscopy (XPS) was performed with an Axis Ultra (Kratos) spectrometer with monochromatic Al- $K_{\alpha}$  excitation and analyzed using CasaXPS software (Version 2.3.15).

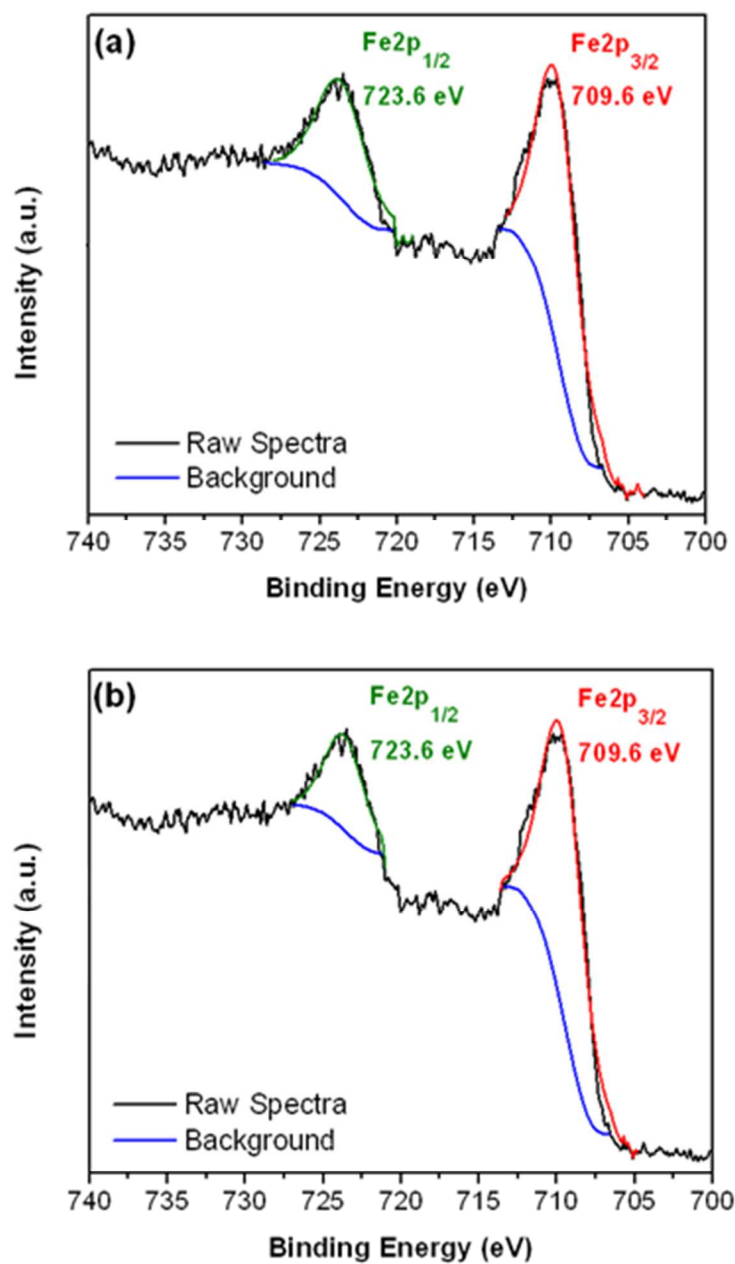

**Figure S1.** High resolution XPS spectra of (a) A-FeOx-C and (b) A-FeOx-R.

Fourier transform infra-red (FT-IR) spectra were obtained for the samples in KBr pellets using a Perkin Elmer Spectrum GX instrument at a resolution of  $1\text{ cm}^{-1}$ .

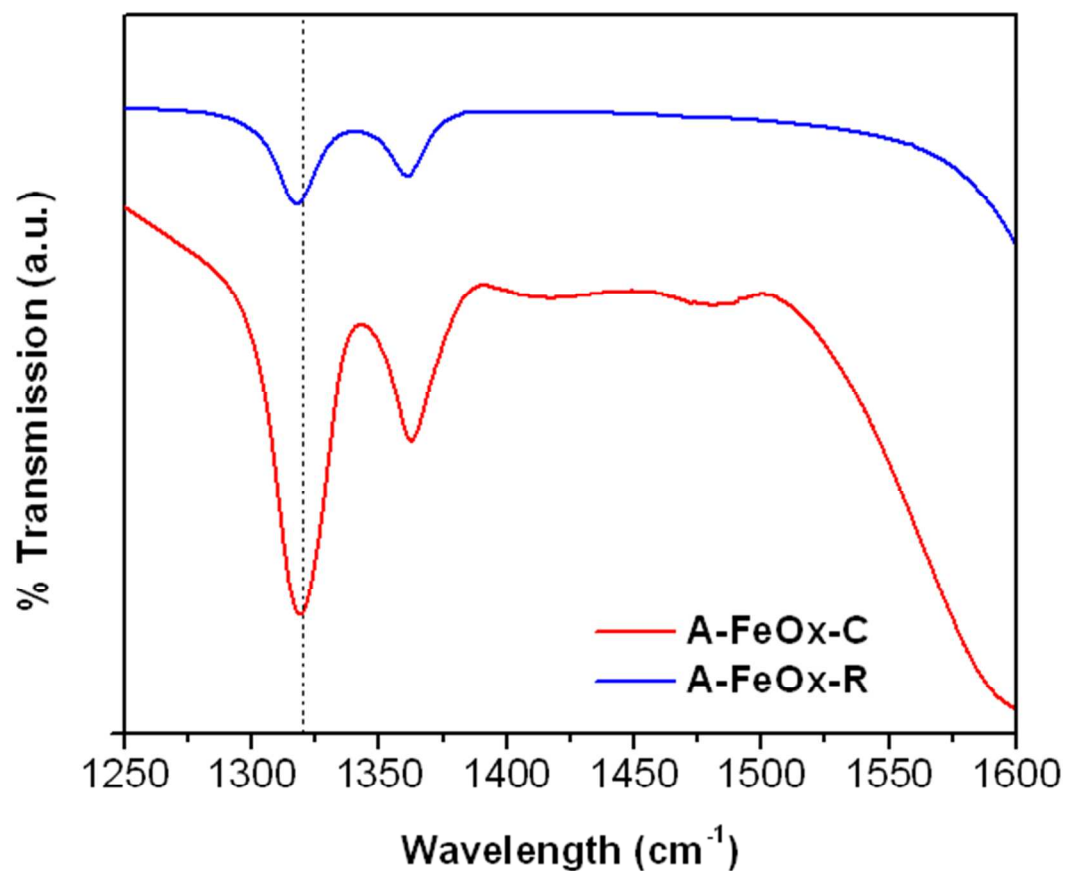

**Figure S2.** FT-IR spectra of A-FeOx samples both showing the oxalate band at ca.  $1320\text{ cm}^{-1}$ .

Surface morphology and microstructure of samples were observed by field emission scanning electron microscopy (FE-SEM) using a JEOL 7600F with an accelerating voltage of 15 kV. The irregular rectangular FeOx blocks have width in the range of 0.6-1.5 $\mu$ m and length in the range of 0.8-3 $\mu$ m.

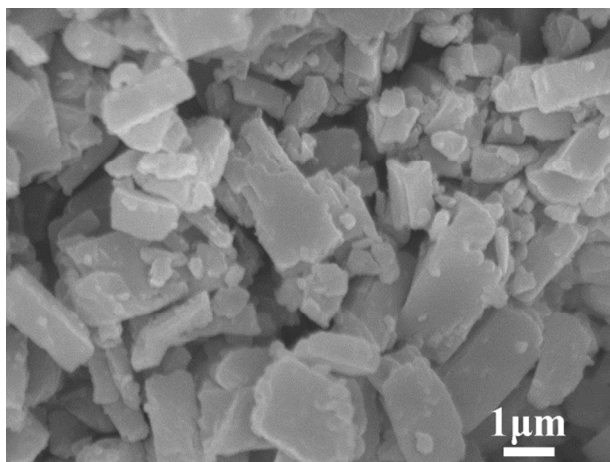

**Figure S3.** FE-SEM micrograph showing as synthesized FeOx using distilled water only.
